# Supplementary material
Source: PubMed Central journal article supplement (PMC5647286)
Supplement: rspb20170834supp1.pdf [file rspb20170834supp1.pdf]

**Title:** The Growth of Finfish in Global Open Ocean Aquaculture under Climate Change

**Running Title:** Open Ocean Aquaculture under Climate Change

**Authors:** Dane H. Klinger<sup>a</sup>, Simon A. Levin<sup>a</sup>, and James R. Watson<sup>a,b</sup>

<sup>a</sup> Department of Ecology and Evolutionary Biology, 106A Guyot Hall, Princeton University,  
Princeton, NJ, USA

<sup>b</sup> Stockholm Resilience Center, Stockholm University, Kräftriket 2B, Stockholm, Sweden

**Corresponding author:** Dane Klinger, +01 (410) 310-8117, [dklinger@princeton.edu](mailto:dklinger@princeton.edu)

## SUPPLEMENTARY INFORMATION

### *1.0 Data limitations – growth curves and physical oceanography*

Temperature-dependent growth data are limited for most fish, and in order to project changes in other farmed species, further research is required to establish their TPCs for growth. For example, there are currently few controlled experiments on temperature-dependent growth in fish across the entire grow-out period. Conducting laboratory temperature and growth experiments with fish over several months or years is expensive and logistically difficult, meaning most studies focus on short-term temperature-growth relationships, reducing the accuracy of estimated TPCs. Further, environmental conditions in offshore grow-out operations differ from laboratory conditions and can alter growth rates and bias TPCs. Controlled temperature experiments in

grow-out environments are logistically prohibitive but would be the most accurate method to estimate the temperature dependence of growth in open ocean aquaculture settings. Farms would be the most viable source of this type of data, but the industry currently has little incentive to share data (Callaway *et al.*, 2012). There is also evidence that fish health and growth rates may be higher offshore than in coastal operations (e.g. Kirchhoff *et al.*, 2011; Maricchiolo *et al.*, 2011). As such, the growth rates used in this study are likely conservative estimates. TPCs change with ontogeny, and although the change within the grow-out period is small relative to other lifestages, there are changes in the shape of the TPC and the optimum and extreme temperatures (Handeland *et al.*, 2008). An improved understanding of the relationship between growth and temperature and growth and other environmental variables (e.g. current and salinity) would allow for the use of more robust growth models with additional dynamic parameters.

Future studies would benefit from additional oceanographic data concerning the depth of thermocline. Open ocean aquaculture technology is improving rapidly, making it possible to establish operations further from shore and in deeper waters. In addition, pens can also be submerged further from the surface to avoid unfavorable surface conditions (Lekang, 2013). A shallow thermocline may mean that farms have to balance surface threats with potentially unfavorable ambient water temperatures at submerged depths below the thermocline. Knowledge of thermocline depth and temperature throughout the water column would allow farmers to balance these trade-offs and target or avoid specific water temperatures. Incorporating thermocline information could also allow the model to exclude areas with seasonally low dissolved oxygen concentrations associated with upwelling.

Daily temperature fluctuations have been shown to be physiologically important to TPC parameters (Kern *et al.*, 2015). Use of higher frequency temperature data (e.g. hourly), coupled with an improved understanding of the physiological mechanisms that govern TPCs, would allow for better predictions of how species respond to temperature change, as the monthly means used in this study can obscure variation and extremes that could alter growth or lead to mortality (Schulte *et al.*, 2011; Sheldon & Dillon, 2016).

Table S1. Values and references for temperature-growth components of each species, Atlantic salmon (*Salmo salar*), gilthead seabream (*Sparus aurata*), and cobia (*Rachycentron canadum*). Extensive literature searches were conducted using both traditional academic sources (e.g. Web of Science and Google Scholar) and industry and gray literature available online. Temperature values ( $T_{min}$ ,  $T_{opt}$ , and  $T_{max}$ ) are determined based on laboratory and field studies. Growth values (monthly growth rate) are determined based on reports from laboratory and field studies and industry reports.

| Species                     | $T_{min}$ | $T_{opt}$ | $T_{max}$ | Monthly Growth Rate<br>grams month <sup>-1</sup> | References                                                                                                                                                                               |
|-----------------------------|-----------|-----------|-----------|--------------------------------------------------|------------------------------------------------------------------------------------------------------------------------------------------------------------------------------------------|
| <i>Salmo salar</i>          | 1.5       | 14        | 19        | 0.33                                             | (FAO, 2015a; Handeland <i>et al.</i> , 2008; Marine Harvest, 2015)                                                                                                                       |
| <i>Sparus aurata</i>        | 12        | 25        | 32.9      | 0.03                                             | (FAO, 2015b; Hernández <i>et al.</i> , 2003; Lupatsch & Kissil, 1998; Seginer, 2016; Silva <i>et al.</i> , 2014; Tort <i>et al.</i> , 2004)                                              |
| <i>Rachycentron canadum</i> | 22        | 29        | 32        | 0.5                                              | (Benetti <i>et al.</i> , 2010; Fraser & Davies, 2009; Kaiser & Holt, 2005; Liao <i>et al.</i> , 2004; Miao <i>et al.</i> , 2009; Nhu <i>et al.</i> , 2011; Schwarz <i>et al.</i> , 2007) |

Table S2. Values of linear function constants for each species, Atlantic salmon (*Salmo salar*), gilthead seabream (*Sparus aurata*), and cobia (*Rachycentron canadum*).

| Species                     | $a_1$  | $a_2$   | $b_1$   | $b_2$  |
|-----------------------------|--------|---------|---------|--------|
| <i>Salmo salar</i>          | 0.0264 | -0.066  | -0.0396 | 1.254  |
| <i>Sparus aurata</i>        | 0.026  | -0.0042 | -0.0308 | 0.1388 |
| <i>Rachycentron canadum</i> | 0.0714 | -0.1667 | -1.5714 | 5.3333 |

Figure S1. Summary of sea surface temperatures increase in Earth System Model CM2.6: The difference between the 2016-2020 and 2046-2050 average monthly temperatures.

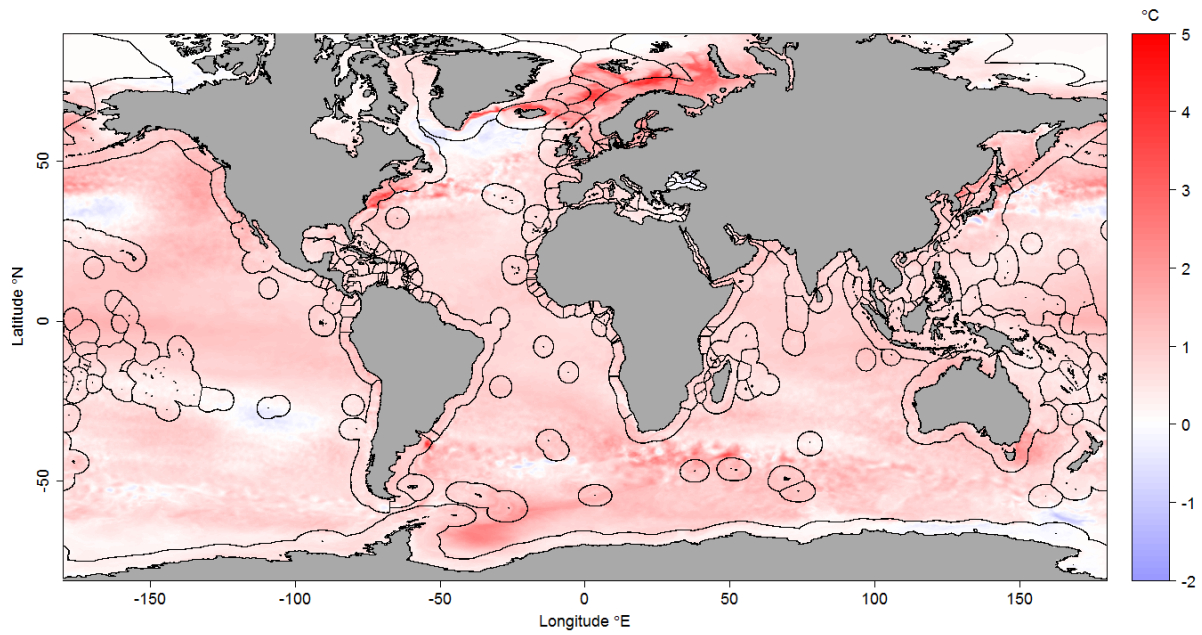

Figure S2. Area available (square kilometers) for salmon growth with application of no constraints (a, red), current (b, purple), eez (c, blue), depth (d, green), and all constraints (e, orange), over 5 year average from 2016-2020.

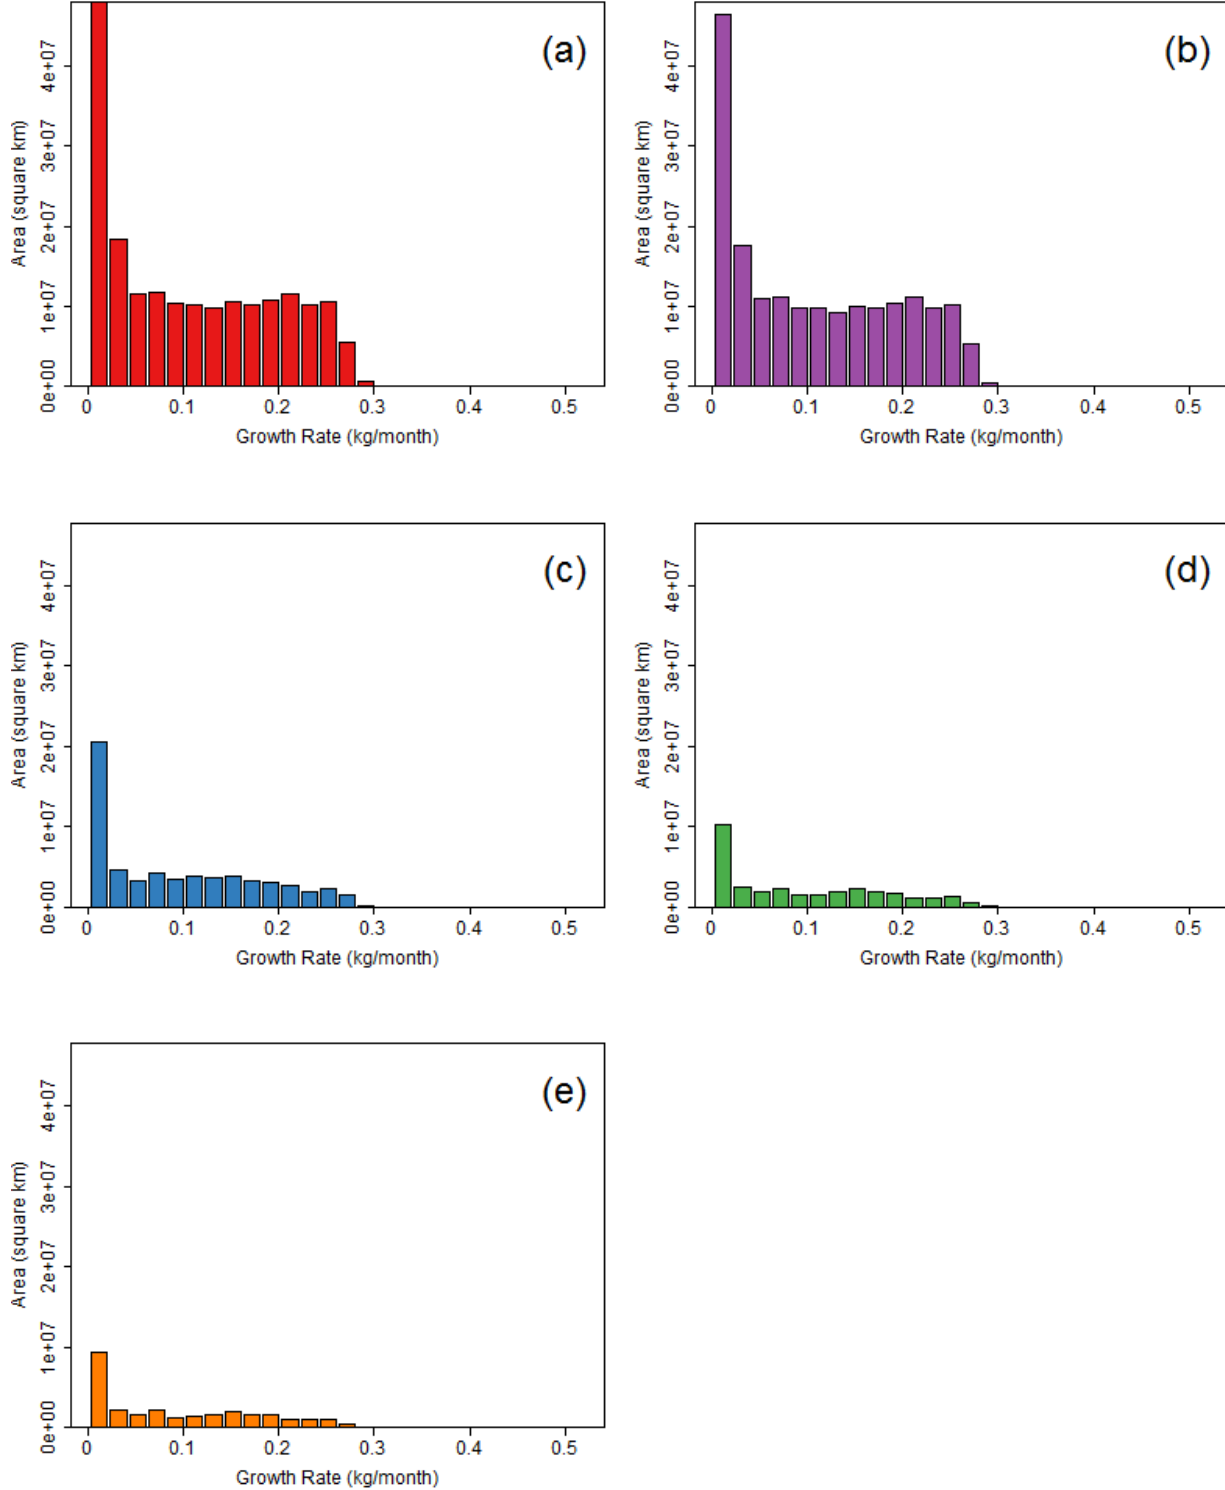

Figure S3. Area available (square kilometers) for seabream growth with application of no constraints (a, red), current (b, purple), eez (c, blue), depth (d, green), and all constraints (e, orange), over 5 year average from 2016-2020.

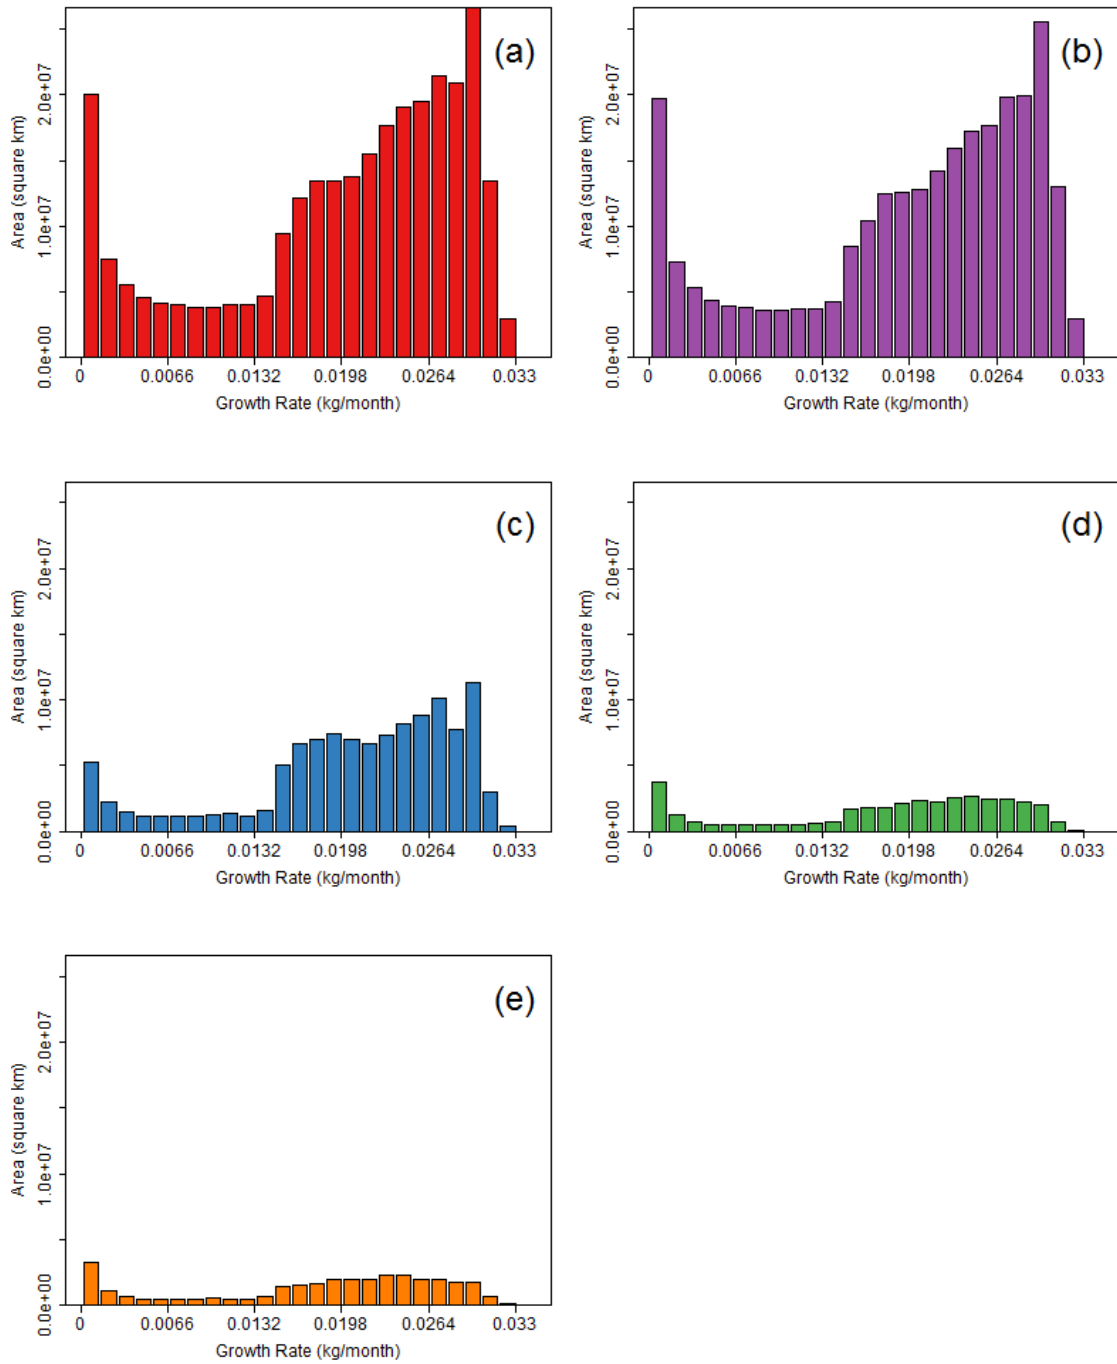

Figure S4. Area available (square kilometers) for cobia growth with application of no constraints (a, red), current (b, purple), eez (c, blue), depth (d, green), and all constraints (e, orange), over 5 year average from 2016-2020.

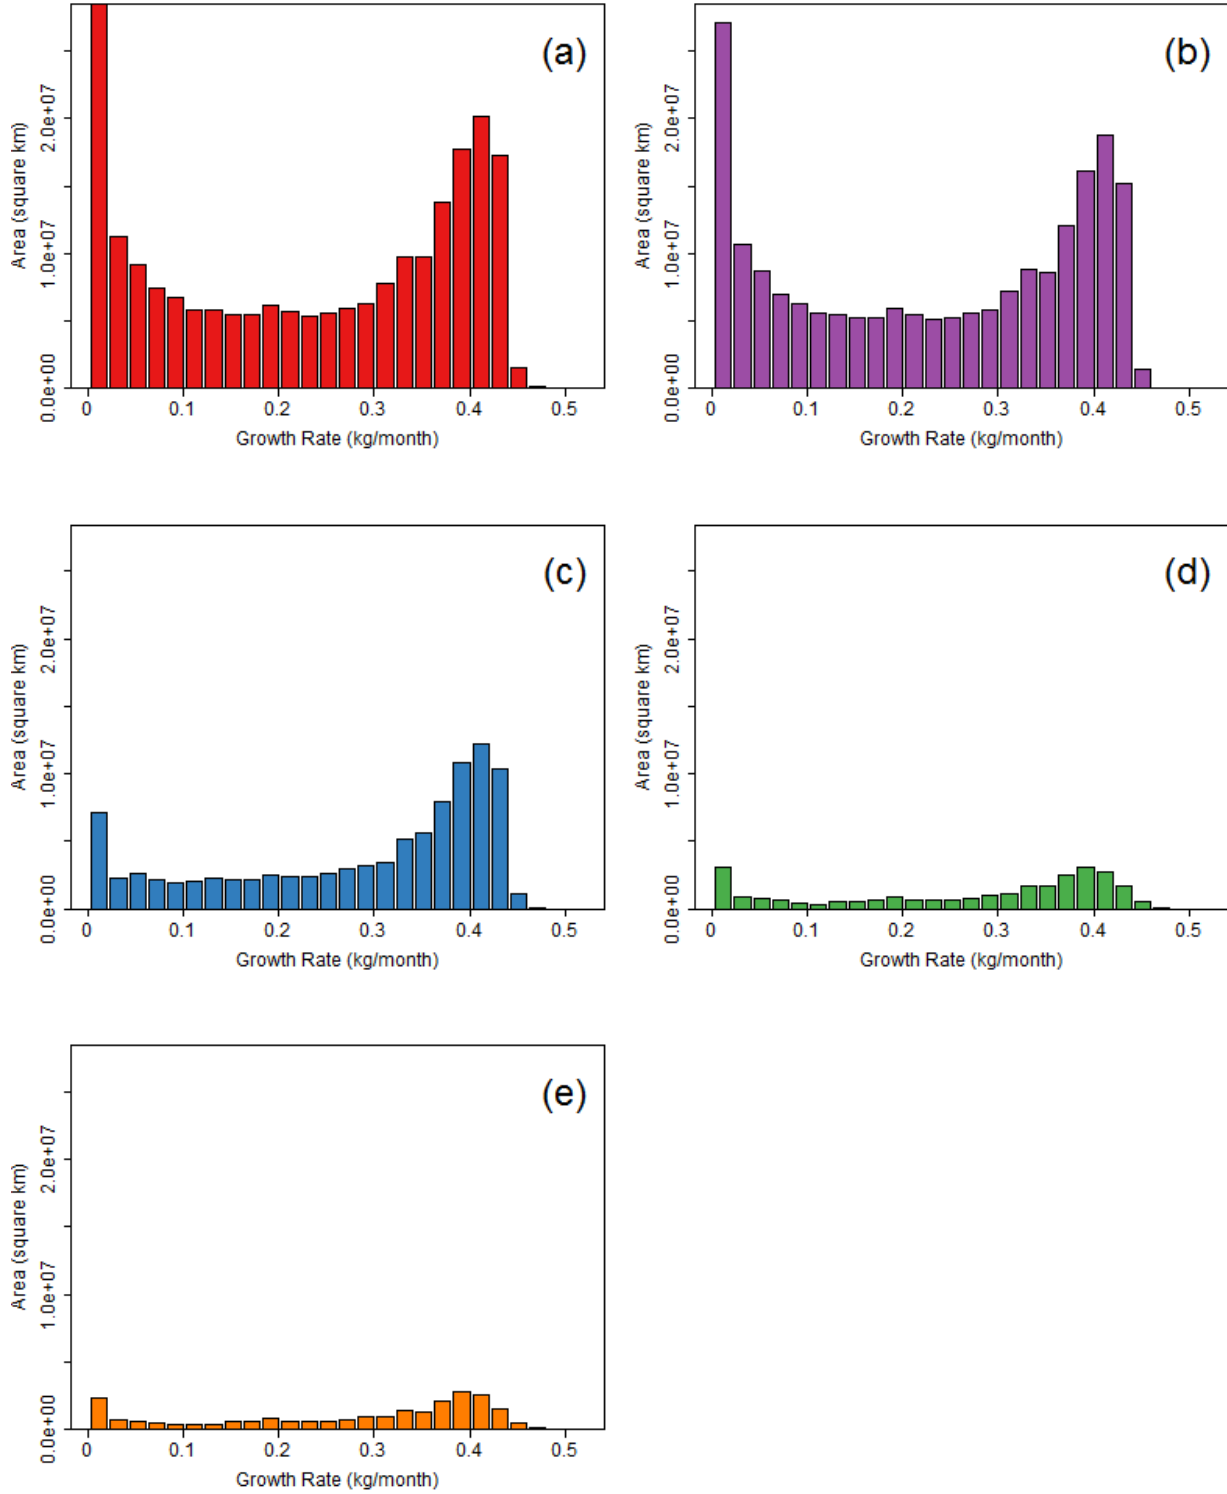



## Supplementary References:

- Benetti DD, O'Hanlon B, Rivera JA, Welch AW, Maxey C, Orhun MR (2010) Growth rates of cobia (*Rachycentron canadum*) cultured in open ocean submerged cages in the Caribbean. *Aquaculture*, **302**, 195-201.
- Callaway R, Shinn AP, Grenfell SE *et al.* (2012) Review of climate change impacts on marine aquaculture in the UK and Ireland. *Aquatic Conservation: Marine and Freshwater Ecosystems*, **22**, 389-421.
- FAO (2015a) Cultured Aquatic Species Information Programme - *Salmo salar* (Linnaeus, 1758).
- FAO (2015b) Cultured Aquatic Species Information Programme - *Sparus aurata* (Linnaeus, 1758).
- Fraser TWK, Davies SJ (2009) Nutritional requirements of cobia, *Rachycentron canadum* (Linnaeus): a review. *Aquaculture Research*, **40**, 1219-1234.
- Handeland SO, Imsland AK, Stefansson SO (2008) The effect of temperature and fish size on growth, feed intake, food conversion efficiency and stomach evacuation rate of Atlantic salmon post-smolts. *Aquaculture*, **283**, 36-42.
- Hernández JM, Gasca-Leyva E, León CJ, Vergara JM (2003) A growth model for gilthead seabream (*Sparus aurata*). *Ecological Modelling*, **165**, 265-283.
- Kaiser JB, Holt J (2005) *Species profile: Cobia*, Southern Regional Aquaculture Center.
- Kern P, Cramp RL, Franklin CE (2015) Physiological responses of ectotherms to daily temperature variation. *Journal of Experimental Biology*, **218**, 3068-3076.
- Kirchhoff NT, Rough KM, Nowak BF (2011) Moving cages further offshore: Effects on southern bluefin tuna, *T. maccoyii*, parasites, health and performance. *PLoS ONE*, **6**, e23705.
- Lekang O-I (2013) *Aquaculture Engineering*, Wiley-Blackwell.
- Liao IC, Huang T-S, Tsai W-S, Hsueh C-M, Chang S-L, Leaño EM (2004) Cobia culture in Taiwan: current status and problems. *Aquaculture*, **237**, 155-165.
- Lupatsch I, Kissil GW (1998) Predicting aquaculture waste from gilthead seabream (*Sparus aurata*) culture using a nutritional approach. *Aquatic Living Resources*, **11**, 265-268.
- Maricchiolo G, Mirto S, Caruso G, Caruso T, Bonaventura R, Matranga V, Genovese L (2011) Welfare status of cage farmed European sea bass (*Dicentrarchus labrax*): A comparison between submerged and surface cages. *Aquaculture*, **214**, 173-181.
- Marine Harvest (2015) *Salmon farming industry handbook 2015*, Marine Harvest.
- Miao S, Jen C, Huang C, Hu S-H (2009) Ecological and economic analysis for cobia *Rachycentron canadum* commercial cage culture in Taiwan. *Aquaculture International*, **17**, 125-141.
- Nhu VC, Nguyen HQ, Le TL *et al.* (2011) Cobia *Rachycentron canadum* aquaculture in Vietnam: Recent developments and prospects. *Aquaculture*, **315**, 20-25.
- Schulte PM, Healy TM, Fanguie NA (2011) Thermal performance curves, phenotypic plasticity, and the time scales of temperature exposure. *Integrative and Comparative Biology*, **icr097**, 1-12.
- Schwarz MH, Mowry D, McLean E, Craig SR (2007) Performance of Advanced Juvenile Cobia, *Rachycentron canadum*, Reared Under Different Thermal Regimes: Evidence for Compensatory Growth and a Method for Cold Banking. *Journal of Applied Aquaculture*, **19**, 71-84.
- Seginer I (2016) Growth models of gilthead sea bream (*Sparus aurata* L.) for aquaculture: A review. *Aquacultural Engineering*, **70**, 15-32.
- Sheldon KS, Dillon ME (2016) Beyond the Mean: Biological Impacts of Cryptic Temperature Change. *Integrative and Comparative Biology*.
- Silva TS, da Costa AMR, Conceição LEC, Dias JP, Rodrigues PML, Richard N (2014) Metabolic fingerprinting of gilthead seabream (*Sparus aurata*) liver to track interactions between dietary factors and seasonal temperature variations. *PeerJ*, **2**, e527.

Tort L, Rotllant J, Liarte C *et al.* (2004) Effects of temperature decrease on feeding rates, immune indicators and histopathological changes of gilthead sea bream *Sparus aurata* fed with an experimental diet. *Aquaculture*, **229**, 55-65.
